# Supplementary material for: Lysine-specific demethylase LSD1 regulates autophagy in neuroblastoma through SESN2-dependent pathway
Source: PubMed Central journal article supplement (PMC5717079; doi:10.1038/onc.2017.267), 2017-08-07
Supplement: onc2017267x1.pdf [file onc2017267x1.pdf]

## Supplementary Figure 1

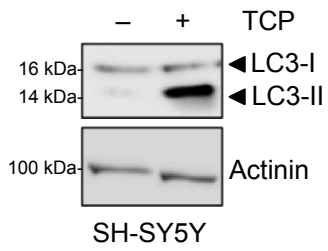

Supplementary Figure 1: SH-SY5Y cells were treated with TCP for 24 h and protein extract were prepared and probed using anti-LC3 antibody. Actinin was probed as loading control.
