# Supplementary material for: Lysine-specific demethylase LSD1 regulates autophagy in neuroblastoma through SESN2-dependent pathway
Source: PubMed Central journal article supplement (PMC5717079; doi:10.1038/onc.2017.267), 2017-08-07
Supplement: onc2017267x4.pdf [file onc2017267x4.pdf]

Table S1: antibodies and oligos used in this work

| Protein                         | Used for | Manufacturer            |
|---------------------------------|----------|-------------------------|
| Actinin                         | WB       | sc-17829, Santa Cruz    |
| Sestrin 2                       | WB       | 10795-1-AP, Proteintech |
| Phospho-S6 Ribosomal Protein    | WB       | 2215, Cell Signaling    |
| S6 Ribosomal Protein            | WB       | 2217, Cell Signaling    |
| Phospho-p70 S6 Kinase (Thr 389) | WB       | 9205, Cell Signaling    |
| p70 S6 Kinase                   | WB       | 2708, Cell Signaling    |
| LC3A/B                          | WB       | 4108, Cell Signaling    |
| LSD1                            | ChIP, WB | ab17721, Abcam          |
| TFEB                            | IF       | 4240, Cell Signaling    |
| H3Ac                            | ChIP     | 06-599, Millipore       |
| H3K27me3                        | ChIP     | 07-449, Millipore       |
| H3K4me2                         | ChIP     | ab32356, Abcam          |
| H3K9me2                         | ChIP     | ab1220, Abcam           |
| LSD2                            | WB       | Ab 193080, Abcam        |

|         | Gene          | FW                             | Rev                            |
|---------|---------------|--------------------------------|--------------------------------|
| qChiP   | SESN2 (-10Kb) | CCAAGTTGTGAATGCAAAGG           | AGCCGAGATCAGGCCACT             |
| qChiP   | SESN2 (TSS)   | AGTCCCTCCAGGAACTGAAA           | GTCATTAGGGTTGCGTGATG           |
| qRT-PCR | SESN2         | GTGGACACCTCCGTGCTC             | GGTTCACCTCCCCATAATCA           |
| qRT-PCR | GUSb          | GTGGGCATTGTGCTACCTC            | ATTTTTGTCCCGGCGAAC             |
| qRT-PCR | SESN1         | GGGCCGTTACCCCTACATTA           | TTCACTAAGTAGGAGCACTGAT<br>GTC  |
| qRT-PCR | SESN3         | GCTAATGACAACAACATAGAGA<br>ATGC | CTCTAGCTCACTTAGAGAATCC<br>ACAA |
| qRT-PCR | LSD2          | CCACAATAAATCAGTCATCATT<br>TCG  | TCTTTGGCTTCCAGGACAGT           |
| qRT-PCR | LSD1          | AGACGACAGTTCTGGAGGGTA          | TCTTGAGAAGTCATCCGGTCA          |
