# Supplementary material for: Lysine-specific demethylase LSD1 regulates autophagy in neuroblastoma through SESN2-dependent pathway
Source: PubMed Central journal article supplement (PMC5717079; doi:10.1038/onc.2017.267), 2017-08-07
Supplement: onc2017267x6.pdf [file onc2017267x6.pdf]

Table S2: oligos used in this work

|         | Gene          | FW                             | Rev                            |
|---------|---------------|--------------------------------|--------------------------------|
| qChiP   | SESN2 (-10Kb) | CCAAGTTGTGAATGCAAAGG           | AGCCGAGATCAGGCCACT             |
| qChiP   | SESN2 (TSS)   | AGTCCCTCCAGGAAGTAAA            | GTCATTAGGGTTGCGTGATG           |
| qRT-PCR | SESN2         | GTGGACACCTCCGTGCTC             | GGTTCACCTCCCATAATCA            |
| qRT-PCR | GUSb          | GTGGGCATTGTGCTACCTC            | ATTTTTGTCCCGGCGAAC             |
| qRT-PCR | SESN1         | GGGCCGTTACCCCTACATTA           | TTCACTAAGTAGGAGCACTGAT<br>GTC  |
| qRT-PCR | SESN3         | GCTAATGACAACAACATAGAGA<br>ATGC | CTCTAGCTCACTTAGAGAATCC<br>ACAA |
| qRT-PCR | LSD2          | CCACAATAAATCAGTCATCATT<br>TCG  | TCTTTGGCTTCCAGGACAGT           |
| qRT-PCR | LSD1          | AGACGACAGTTCTGGAGGGTA          | TCTTGAGAAGTCATCCGGTCA          |
